# Supplementary material for: Nivolumab Plus Ipilimumab vs Nivolumab Alone in Advanced Cancers Other Than Melanoma: A Meta-Analysis
Source: PubMed Central journal article supplement (PMC10472261; doi:10.1001/jamaoncol.2023.3295), 2023-08-31
Supplement: jamaoncol-e233295-s002.pdf [file jamaoncol-e233295-s002.pdf]

## Data Sharing Statement

Serritella. Nivolumab Plus Ipilimumab vs Nivolumab Alone in Advanced Cancers Other Than Melanoma. *JAMA Oncol.* Published August 31, 2023. doi:10.1001/jamaoncol.2023.3295

### Data

**Data available:** No

### Additional Information

**Explanation for why data not available:** This is a meta-analysis that utilized the published data of included studies. The detailed calculations of OS and PFS HR estimation for individual studies based on summary statistics of K-M curves have been provided as a separate supplemental file
